# Supplementary material
Source: Springer Nature journal article supplement (https://www.springermedizin.de/resource/supplementary/12933_2010_277_MOESM3_ESM.pdf/9539996)

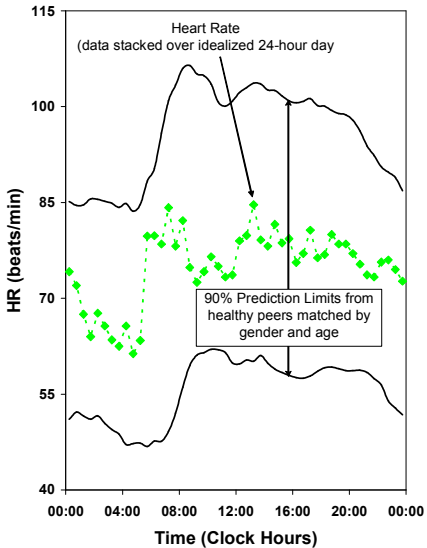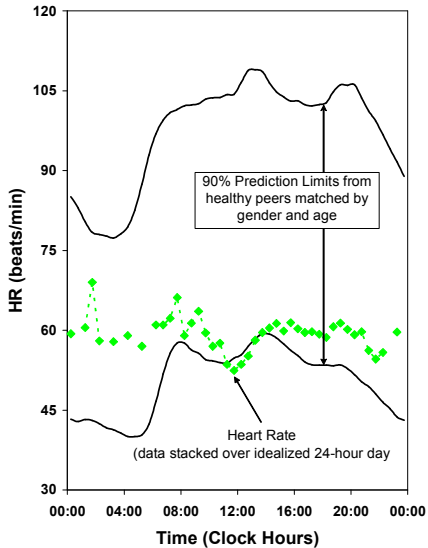

Supplement: MOESM3 [file 9539996]
